# Supplementary material for: A glucose biosensor based on cytochrome c and glucose oxidase co-entrapped in chitosan–gold nanoparticles modified electrode
Source: Royal Society of Chemistry journal article supplement (doi:10.1039/c3ay40399h), 2013-01-01
Supplement: c3ay40399h.pdf [file c3ay40399h.pdf]

# A Glucose Biosensor based on Cytochrome *c* and Glucose Oxidase Co-entrapped in Chitosan-Gold Nanoparticle Modified Electrode

Yonghai Song, Hongyu Liu, Yu Wang and Li Wang

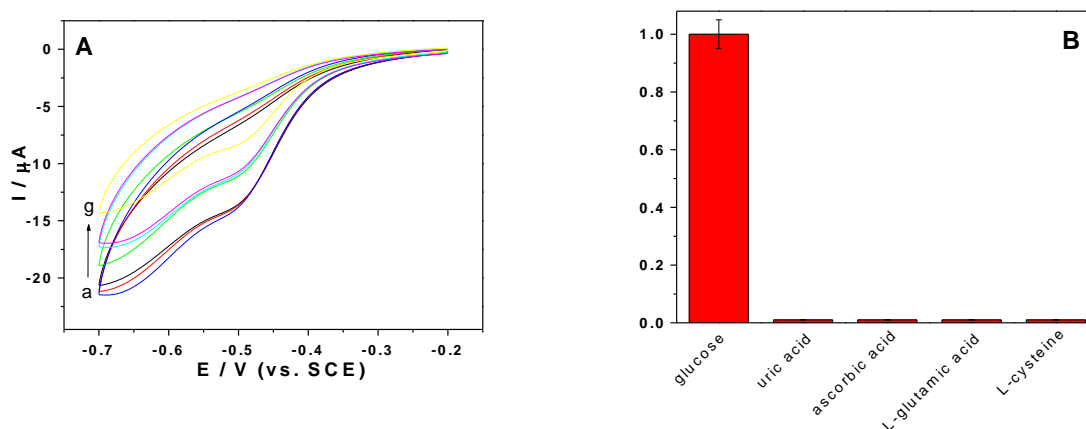

**Fig. S1.** (A) CVs of the GOD-Cyt *c*/AuNPs-CHIT/GCE in 0.2 M O<sub>2</sub>-saturated PBS (pH 7.0) at scan rate of 0.05 V s<sup>-1</sup> in the absence (a) and presence of different interfering substance of 20 mM uric acid (b), 20 mM ascorbic acid (c), 5 mM glucose (d), 20 mM L-glutamic acid (e), 20 mM L-cysteine (f) and 5 mM glucose (g). (B) The respective peak current change after the addition of 4 mM glucose, 20 mM uric acid, 20 mM ascorbic acid, 20 mM L-glutamic acid and 20 mM L-cysteine (f)
